# Supplementary figures and images for: Static Experiment and Finite Element Analysis of a Multitower Cable‐Stayed Bridge with a New Stiffening System
Source: Hindawi journal article supplement (doi:10.1155/2019/4687370), 2019-01-01

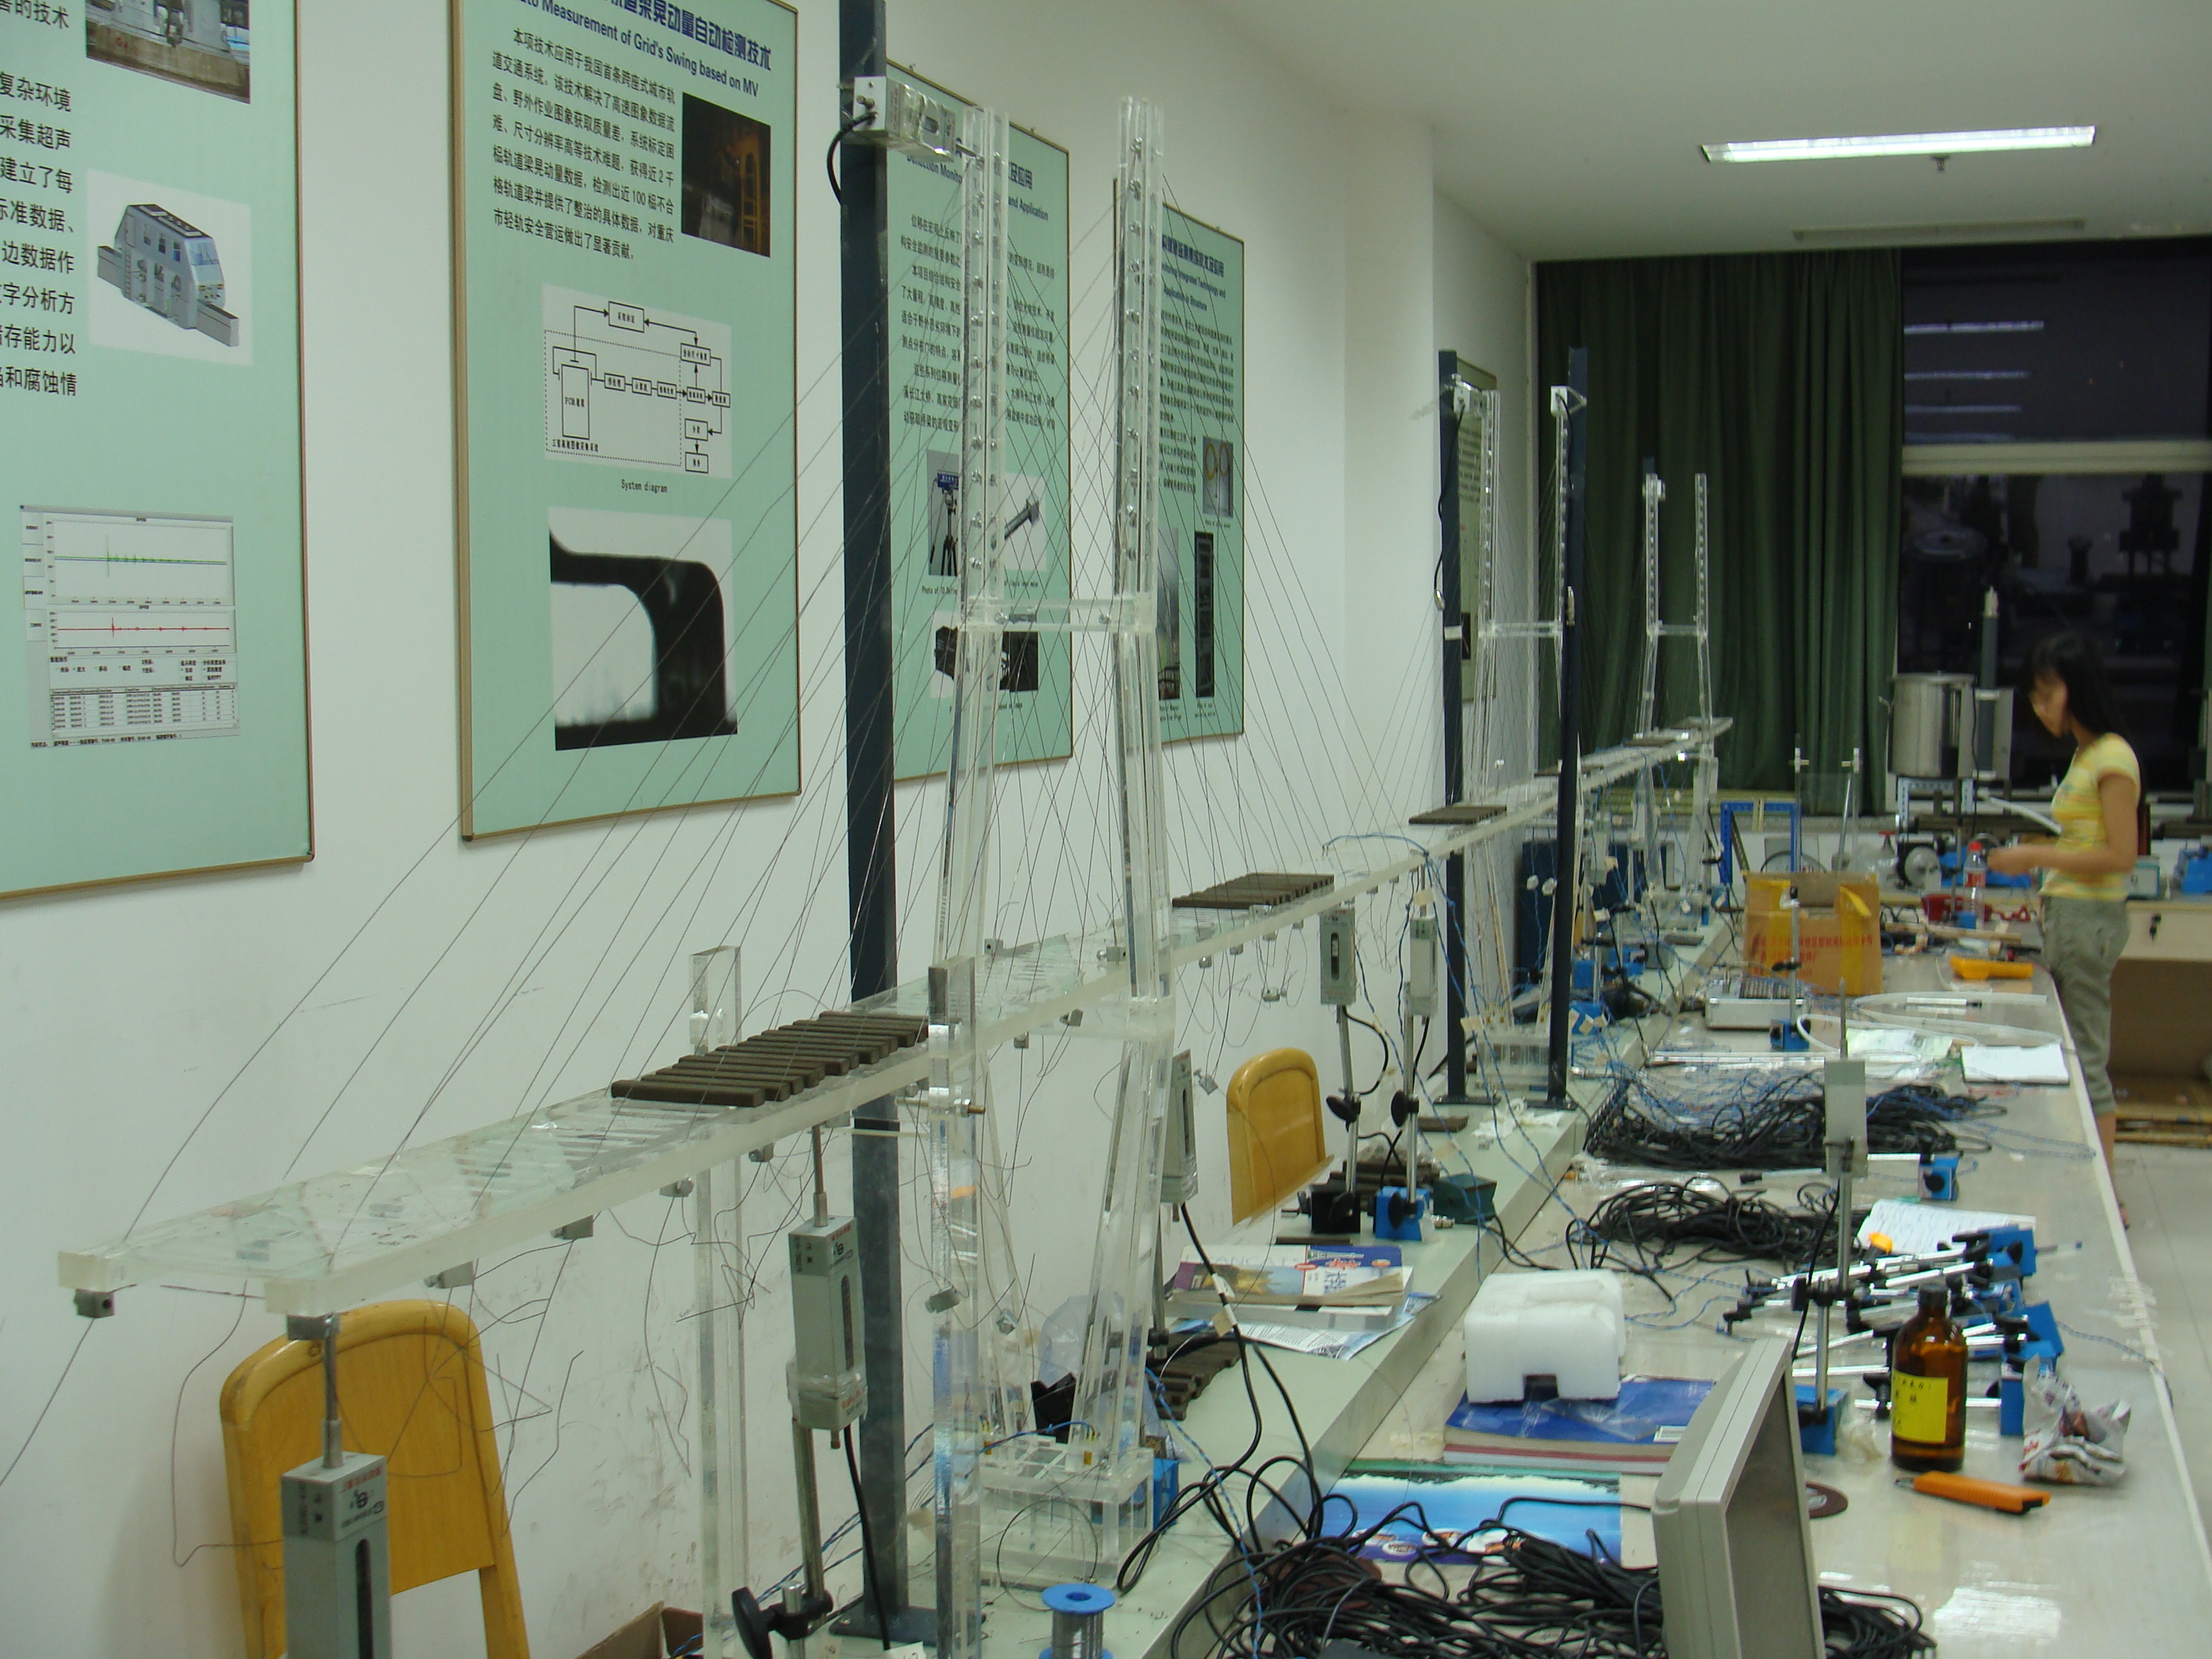

Supplement: f1 [file 4687370.f1.zip › The experimental images/Preloading.JPG]

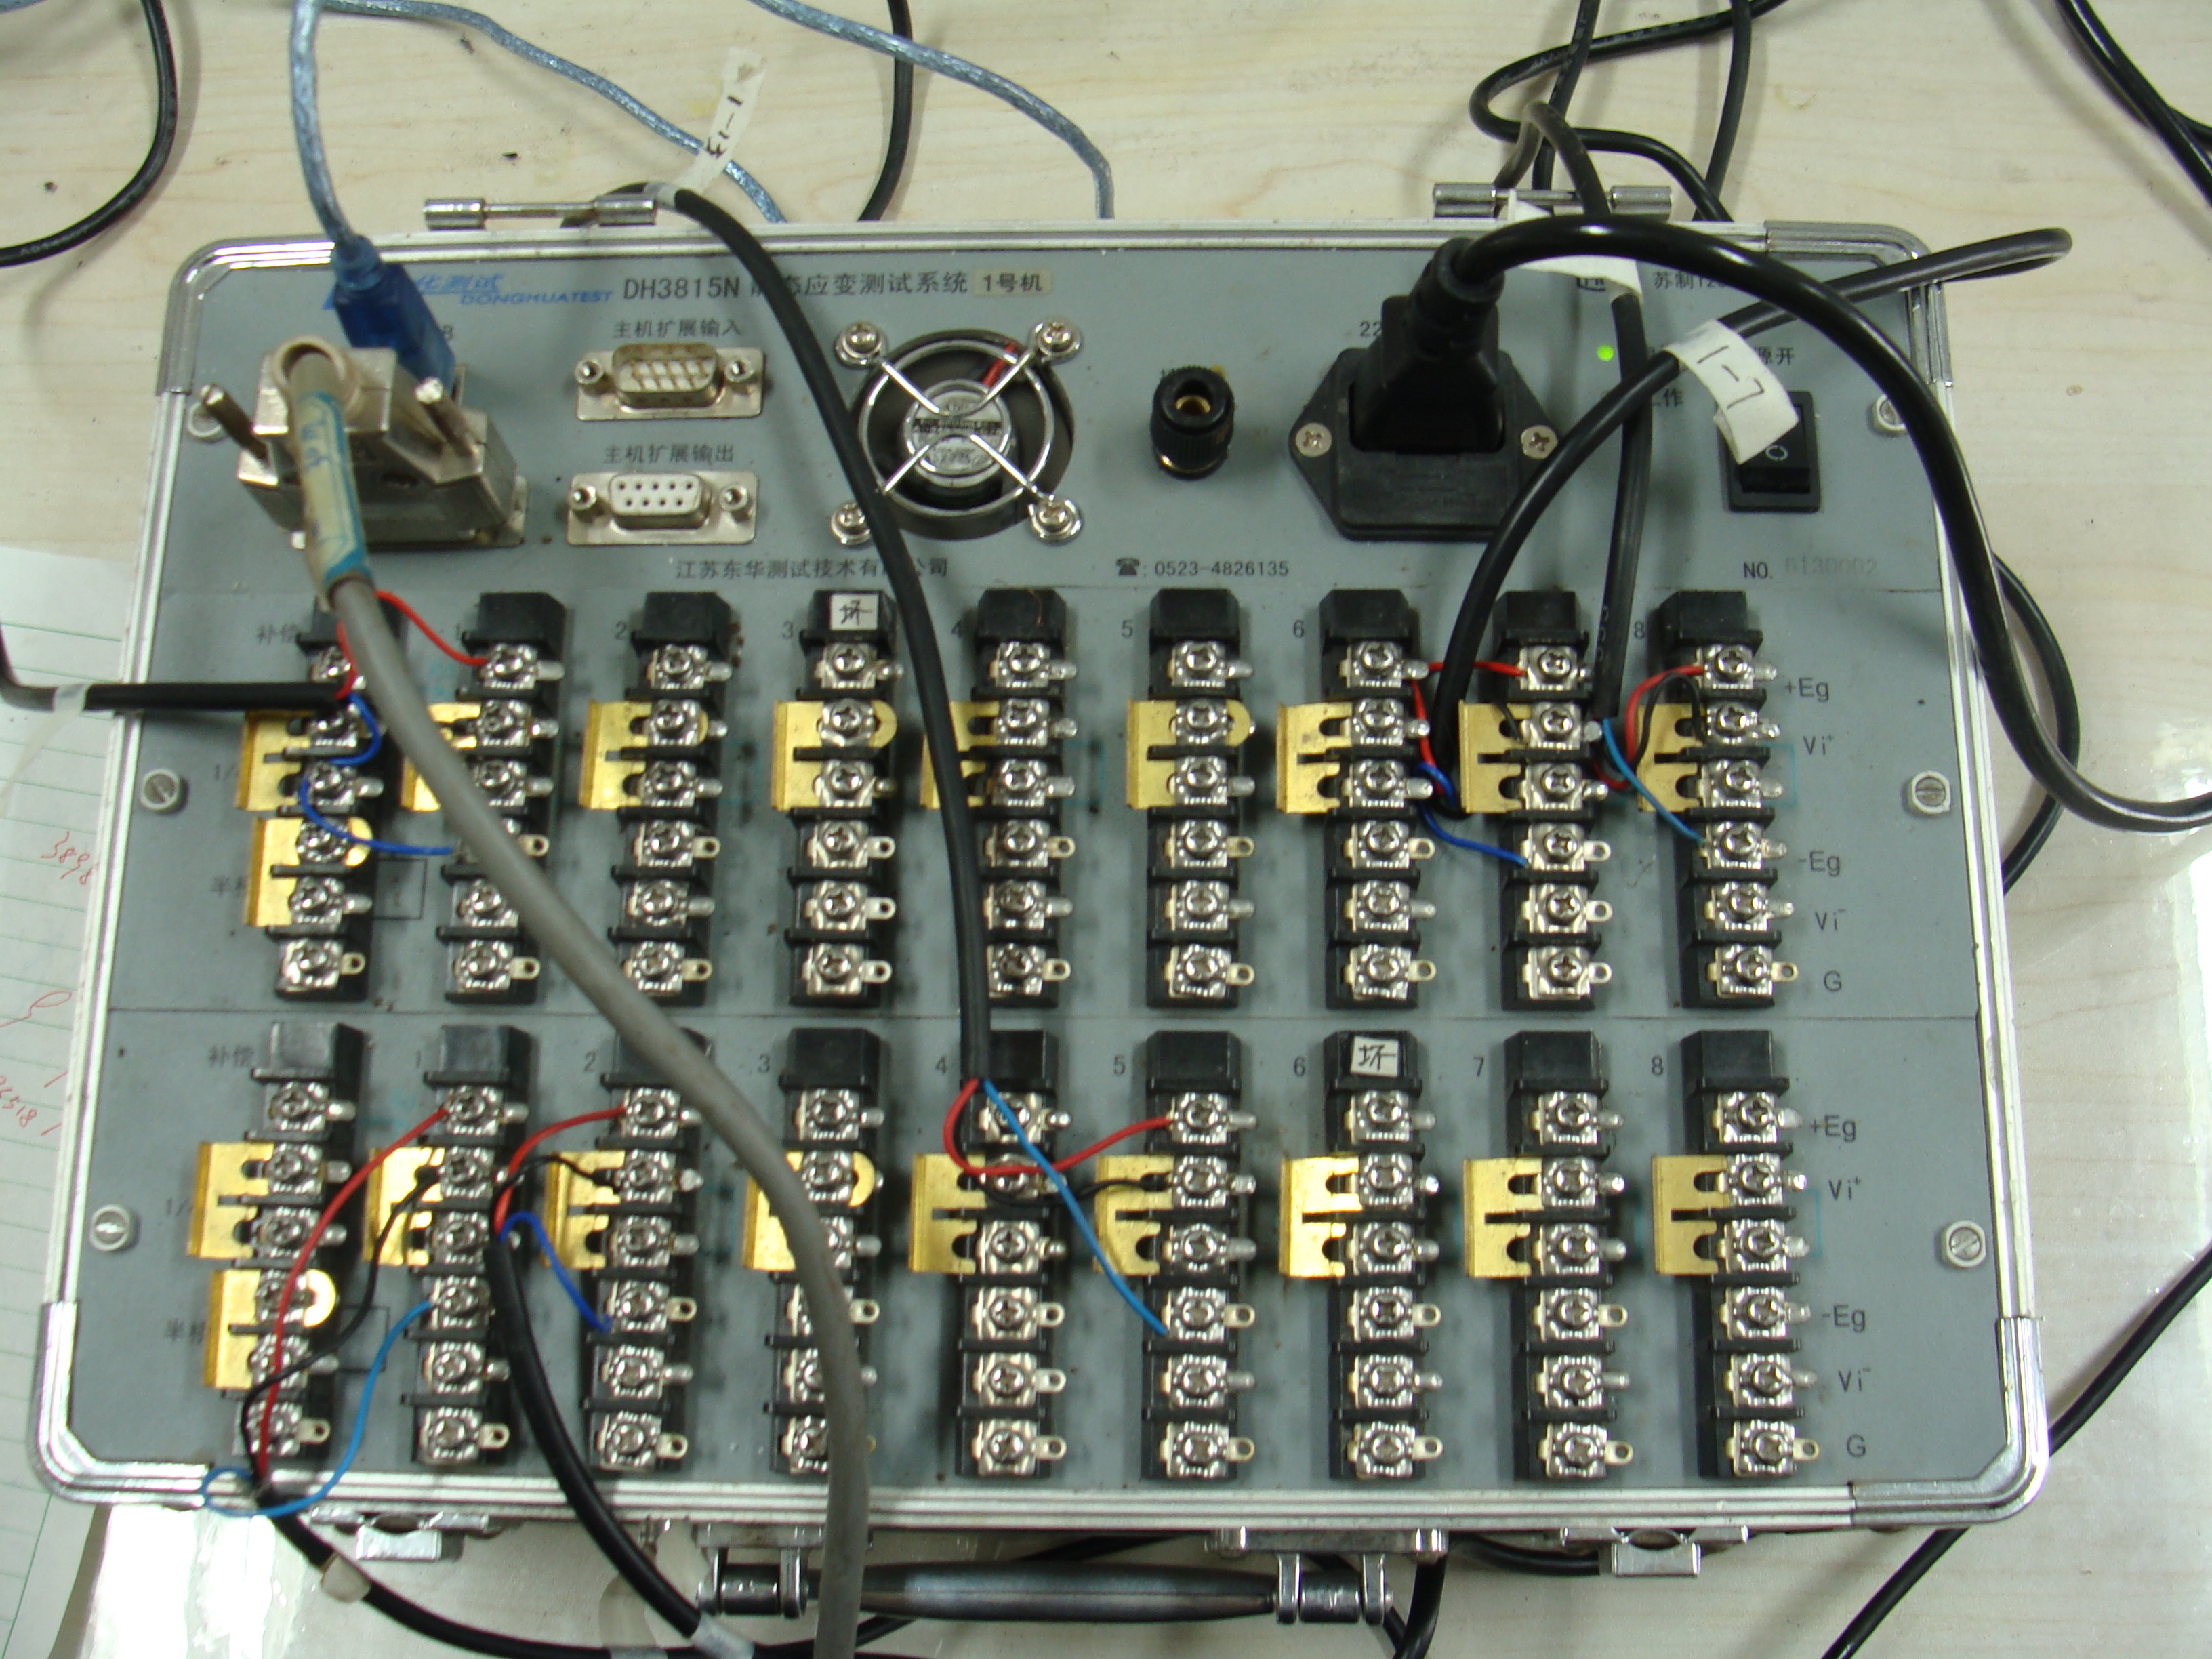

Supplement: f1 [file 4687370.f1.zip › The experimental images/Strain acquisition box.JPG]

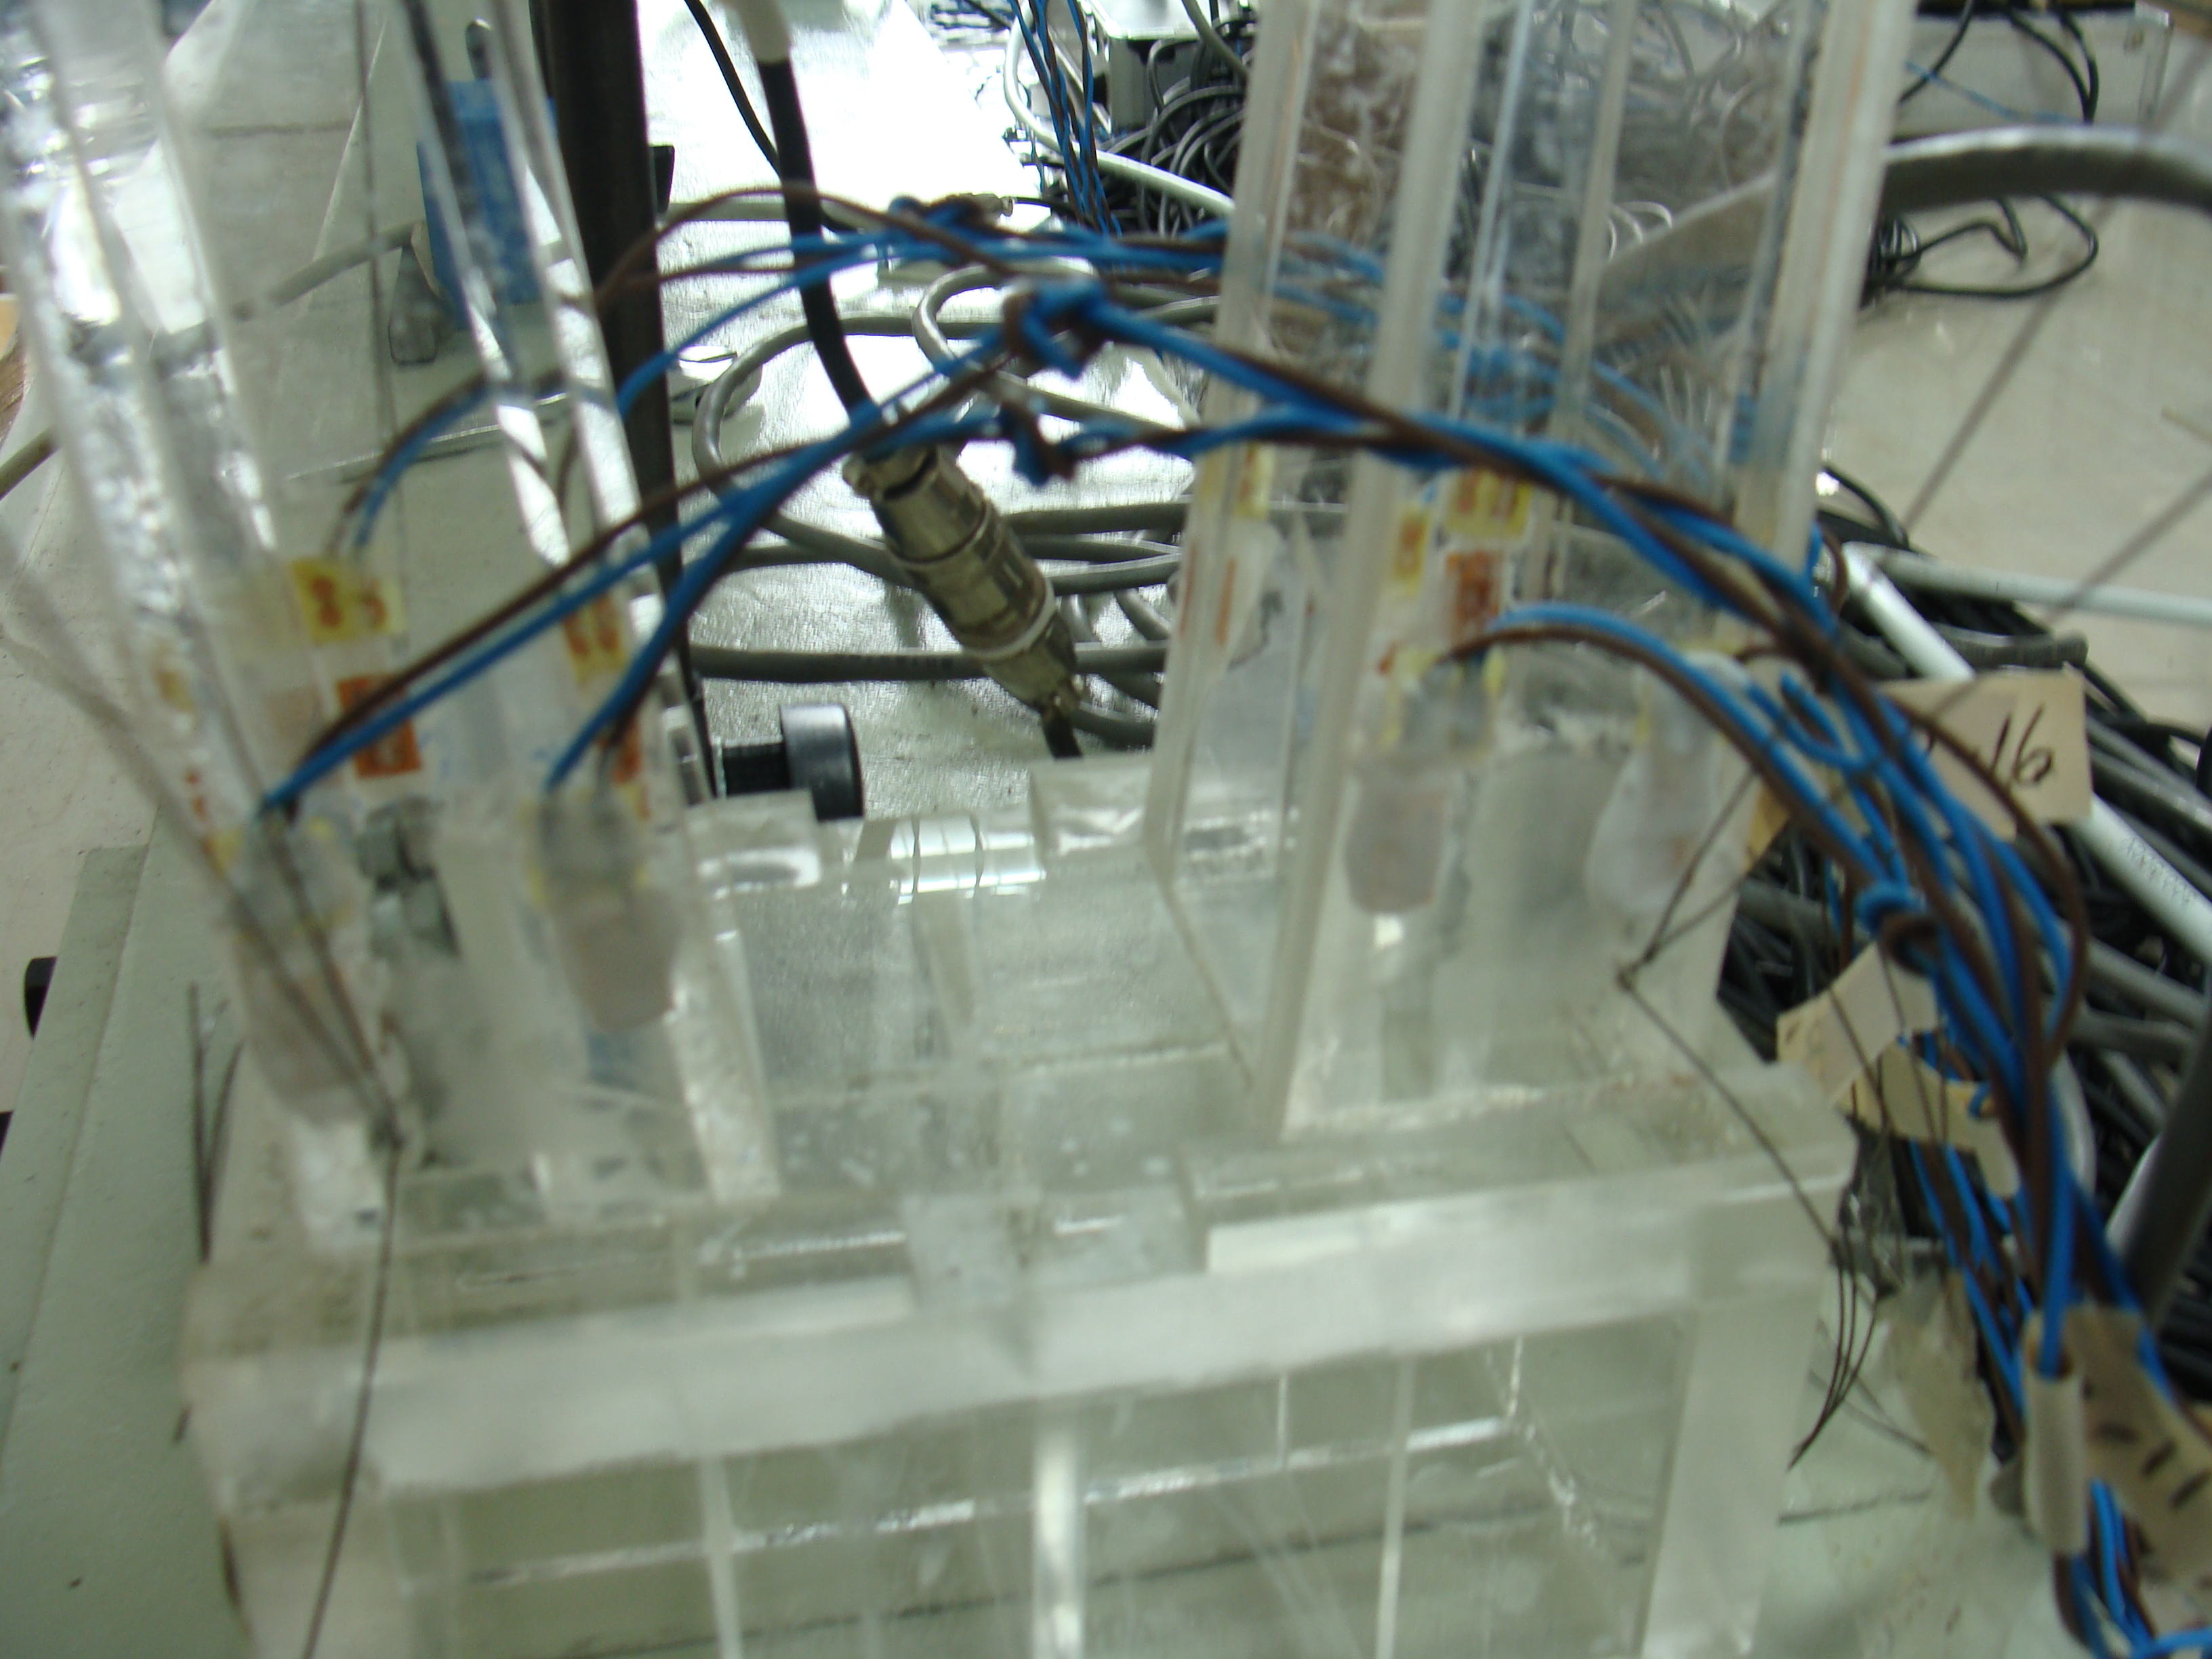

Supplement: f1 [file 4687370.f1.zip › The experimental images/Strain gauge at base of main tower.JPG]

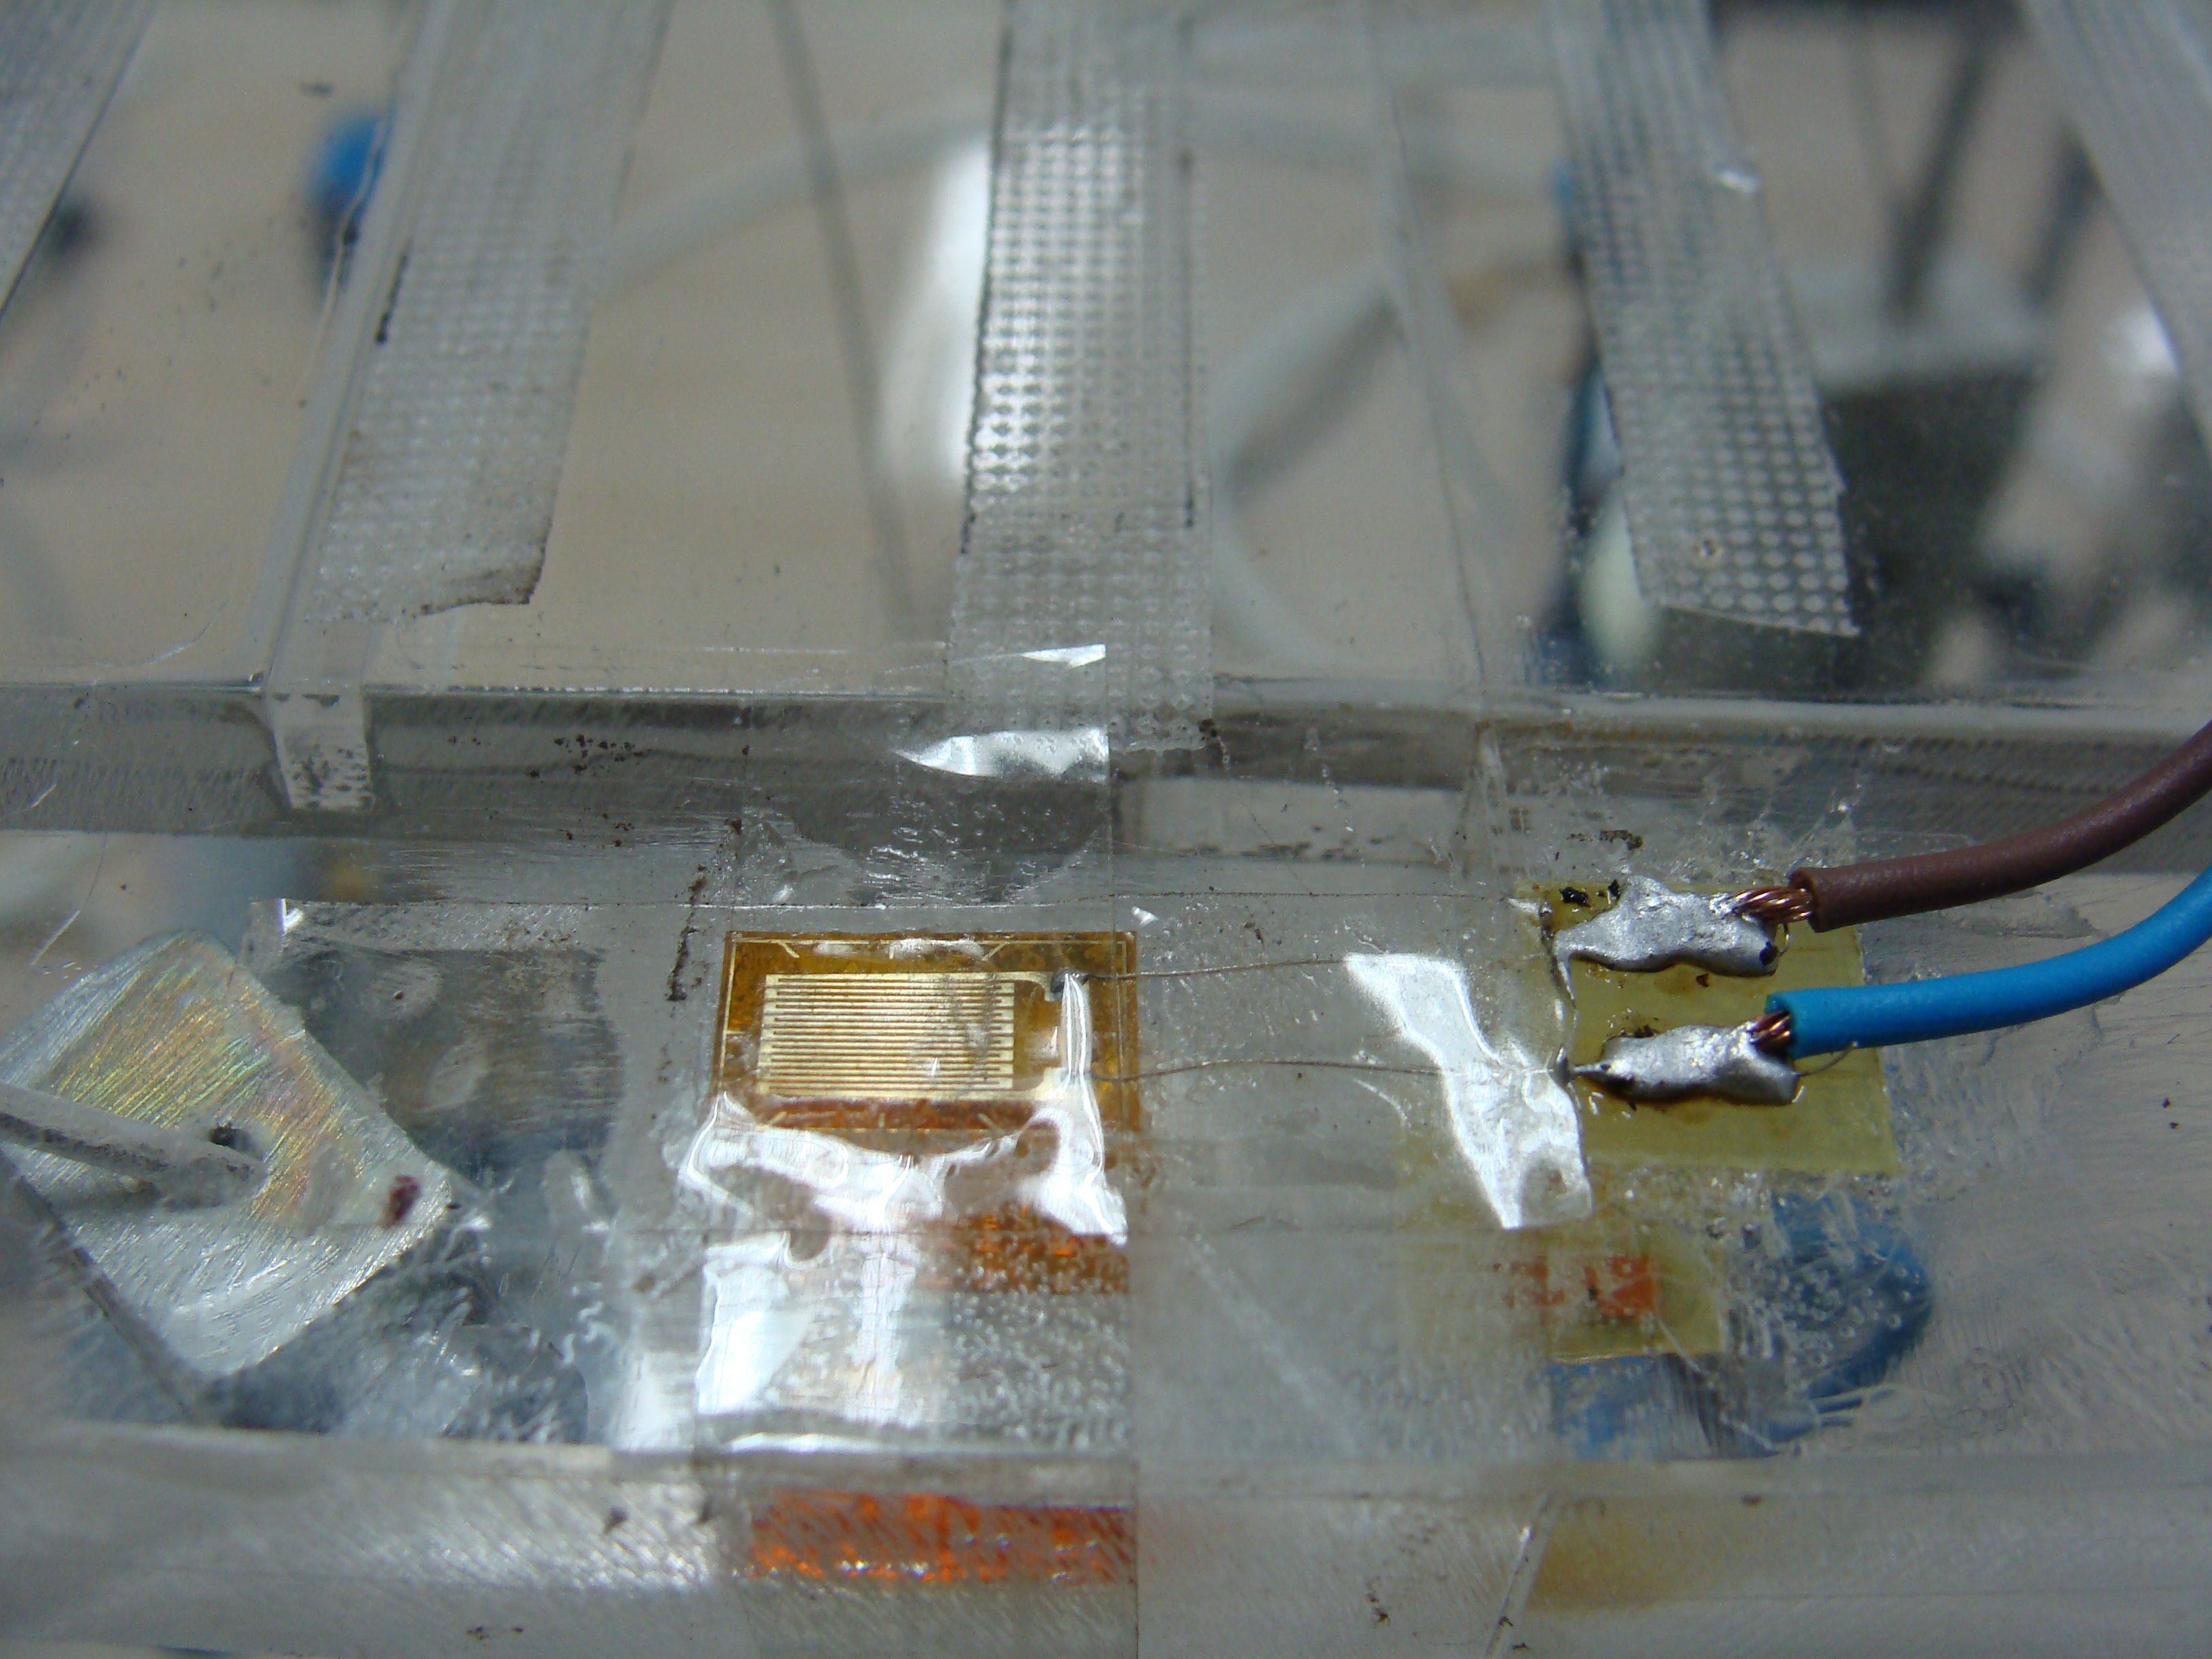

Supplement: f1 [file 4687370.f1.zip › The experimental images/Strain gauge of the main girder.JPG]

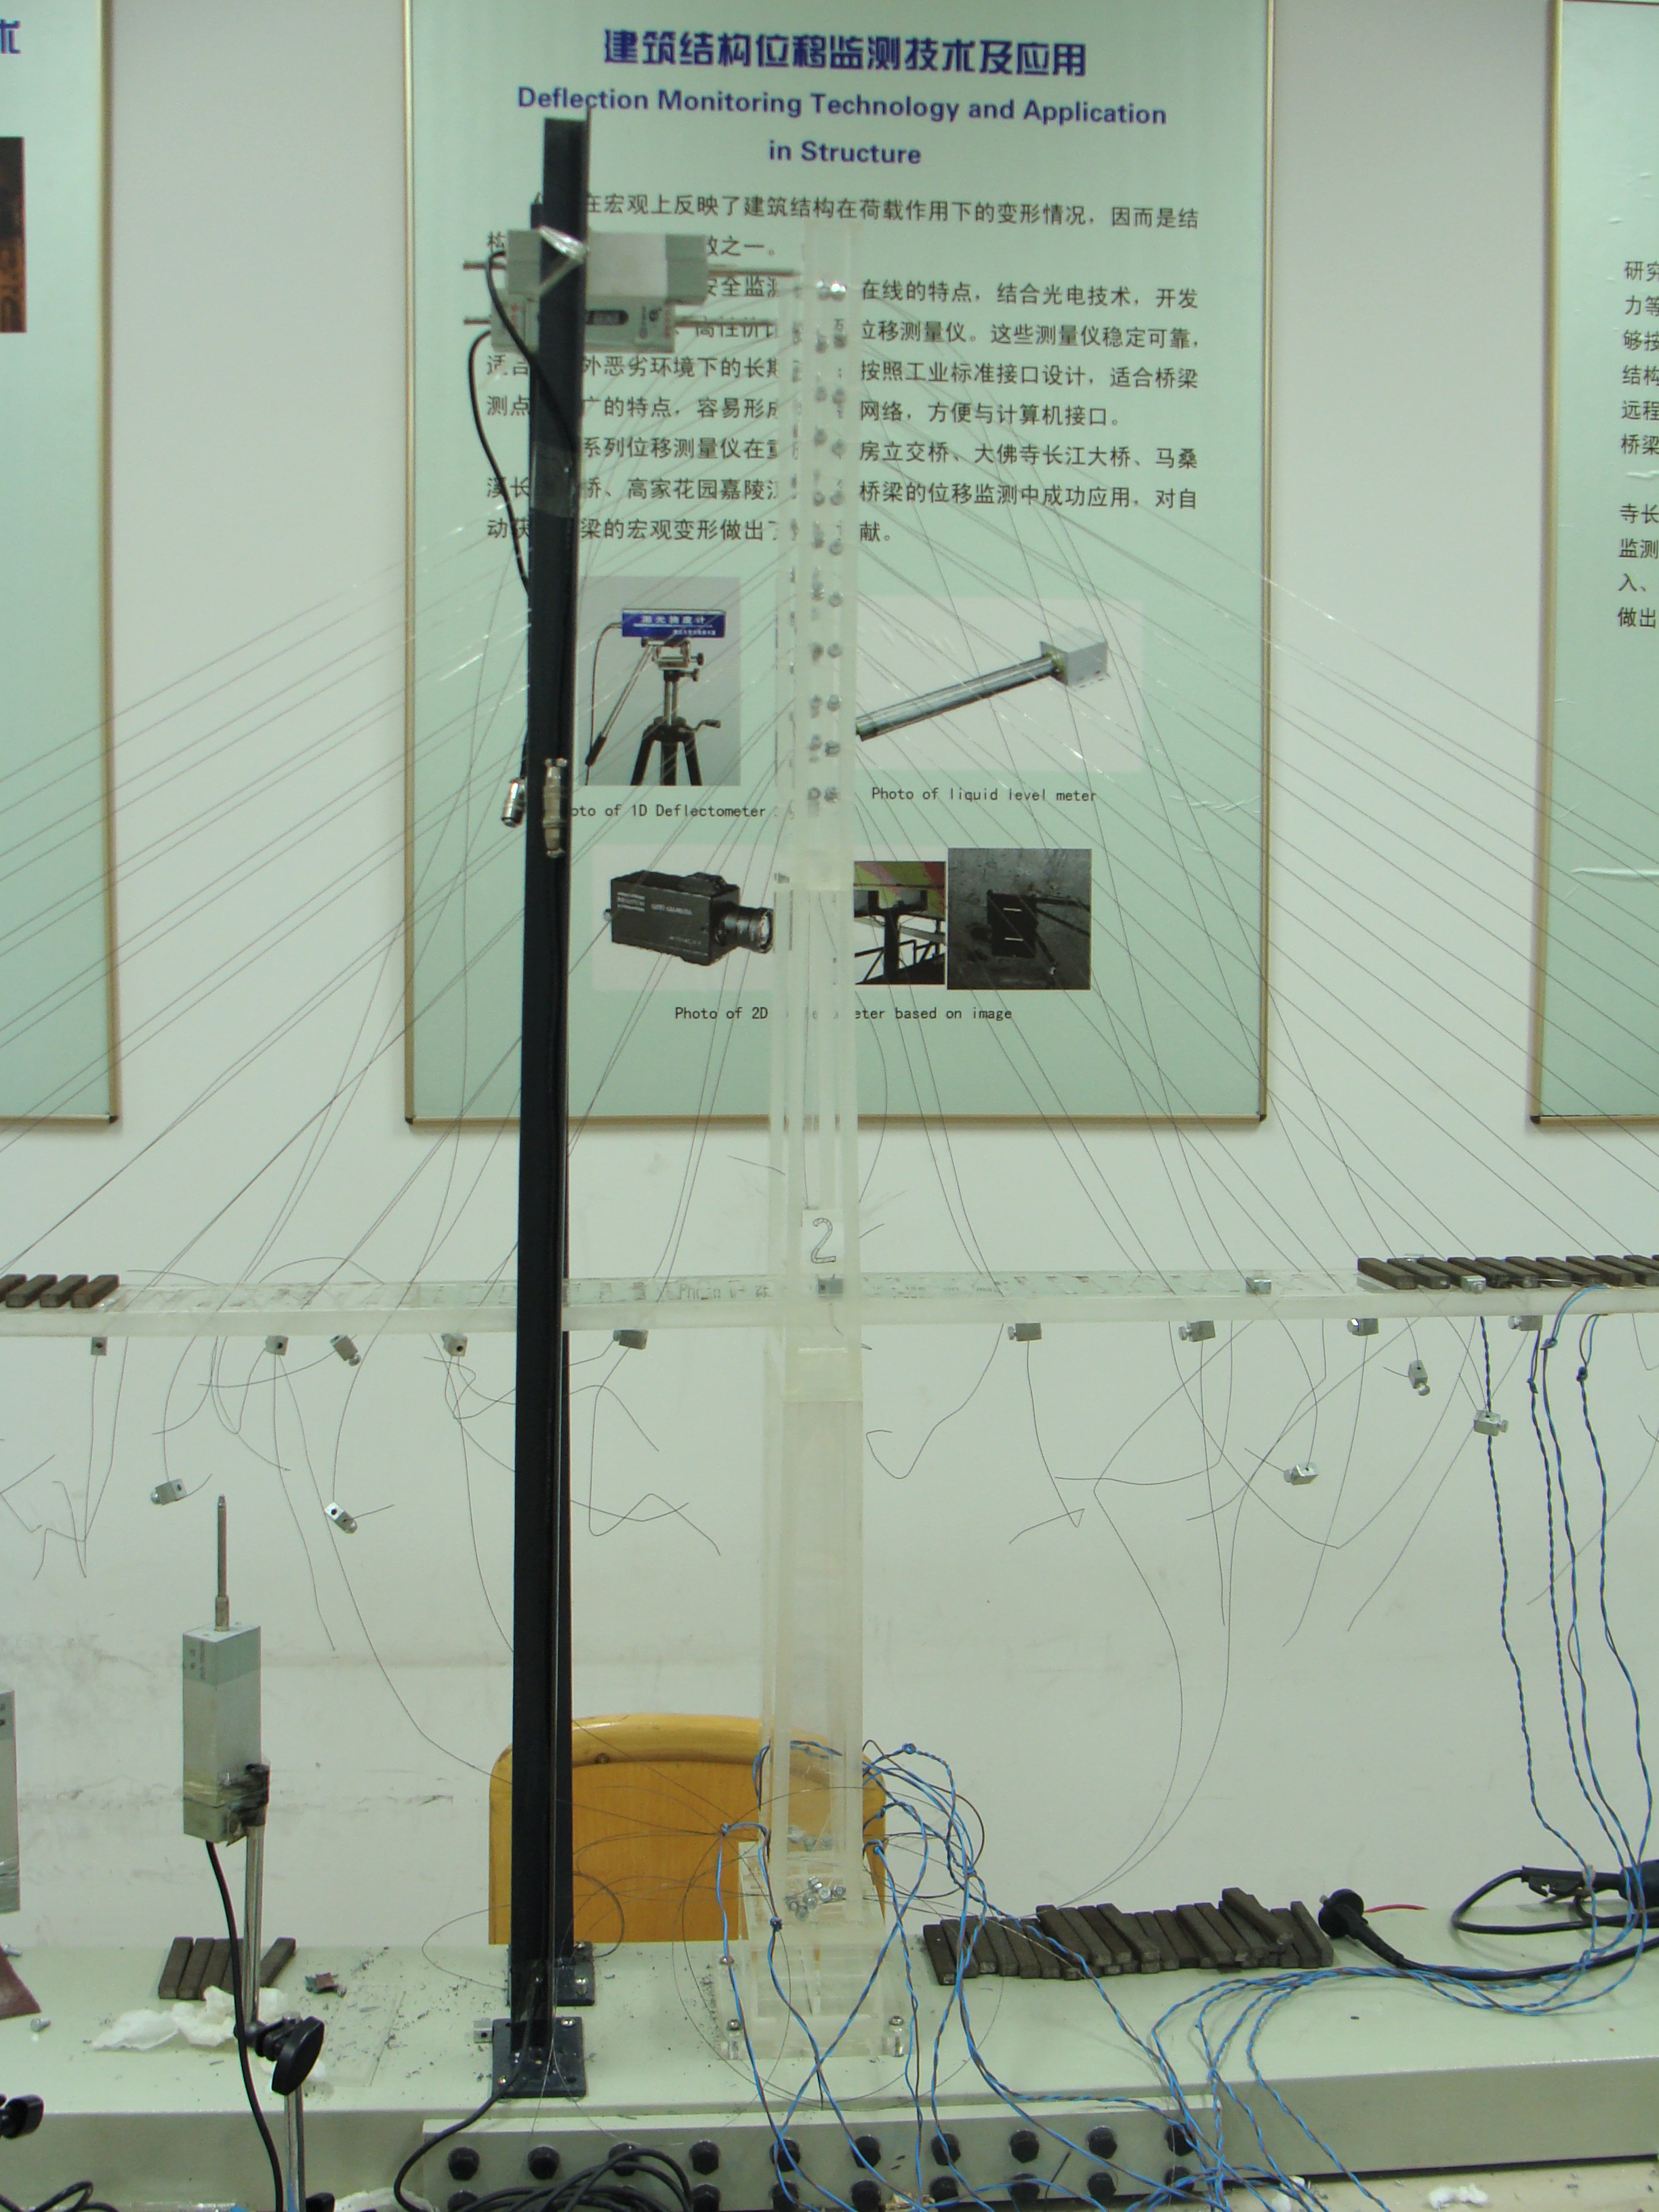

Supplement: f1 [file 4687370.f1.zip › The experimental images/The horizontal displacement meter of the main tower.JPG]

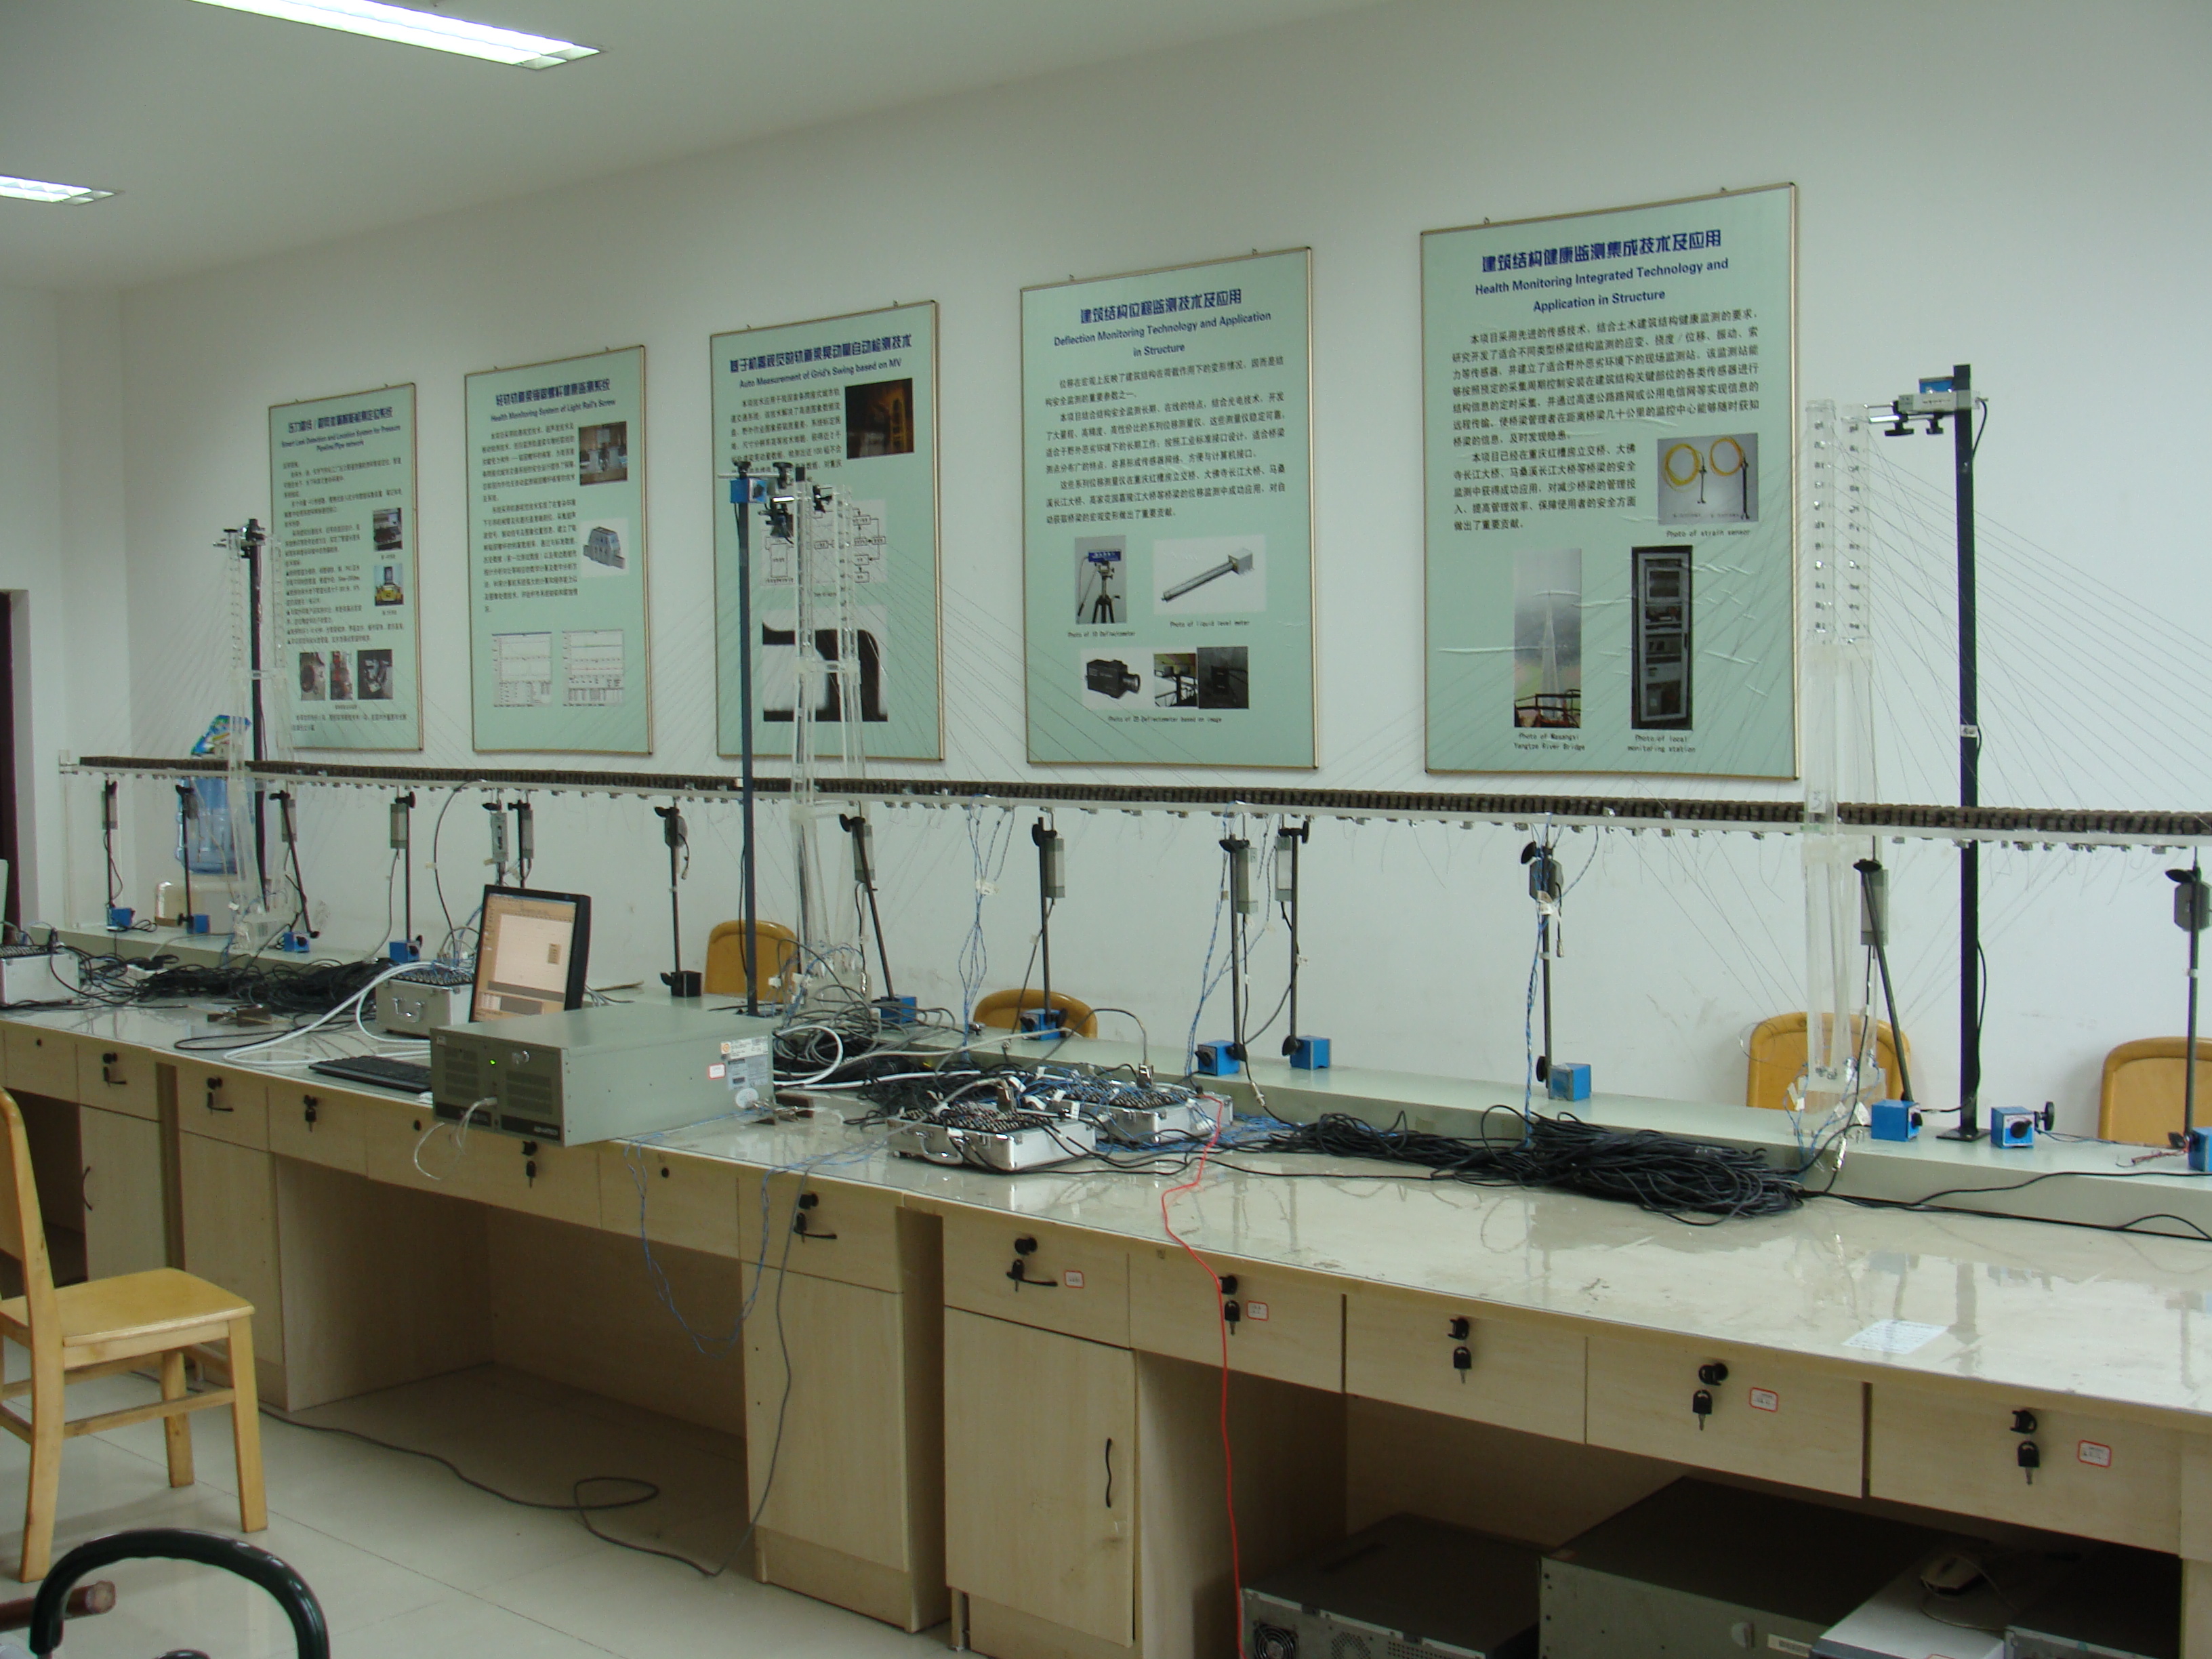

Supplement: f1 [file 4687370.f1.zip › The experimental images/The static experiment.JPG]

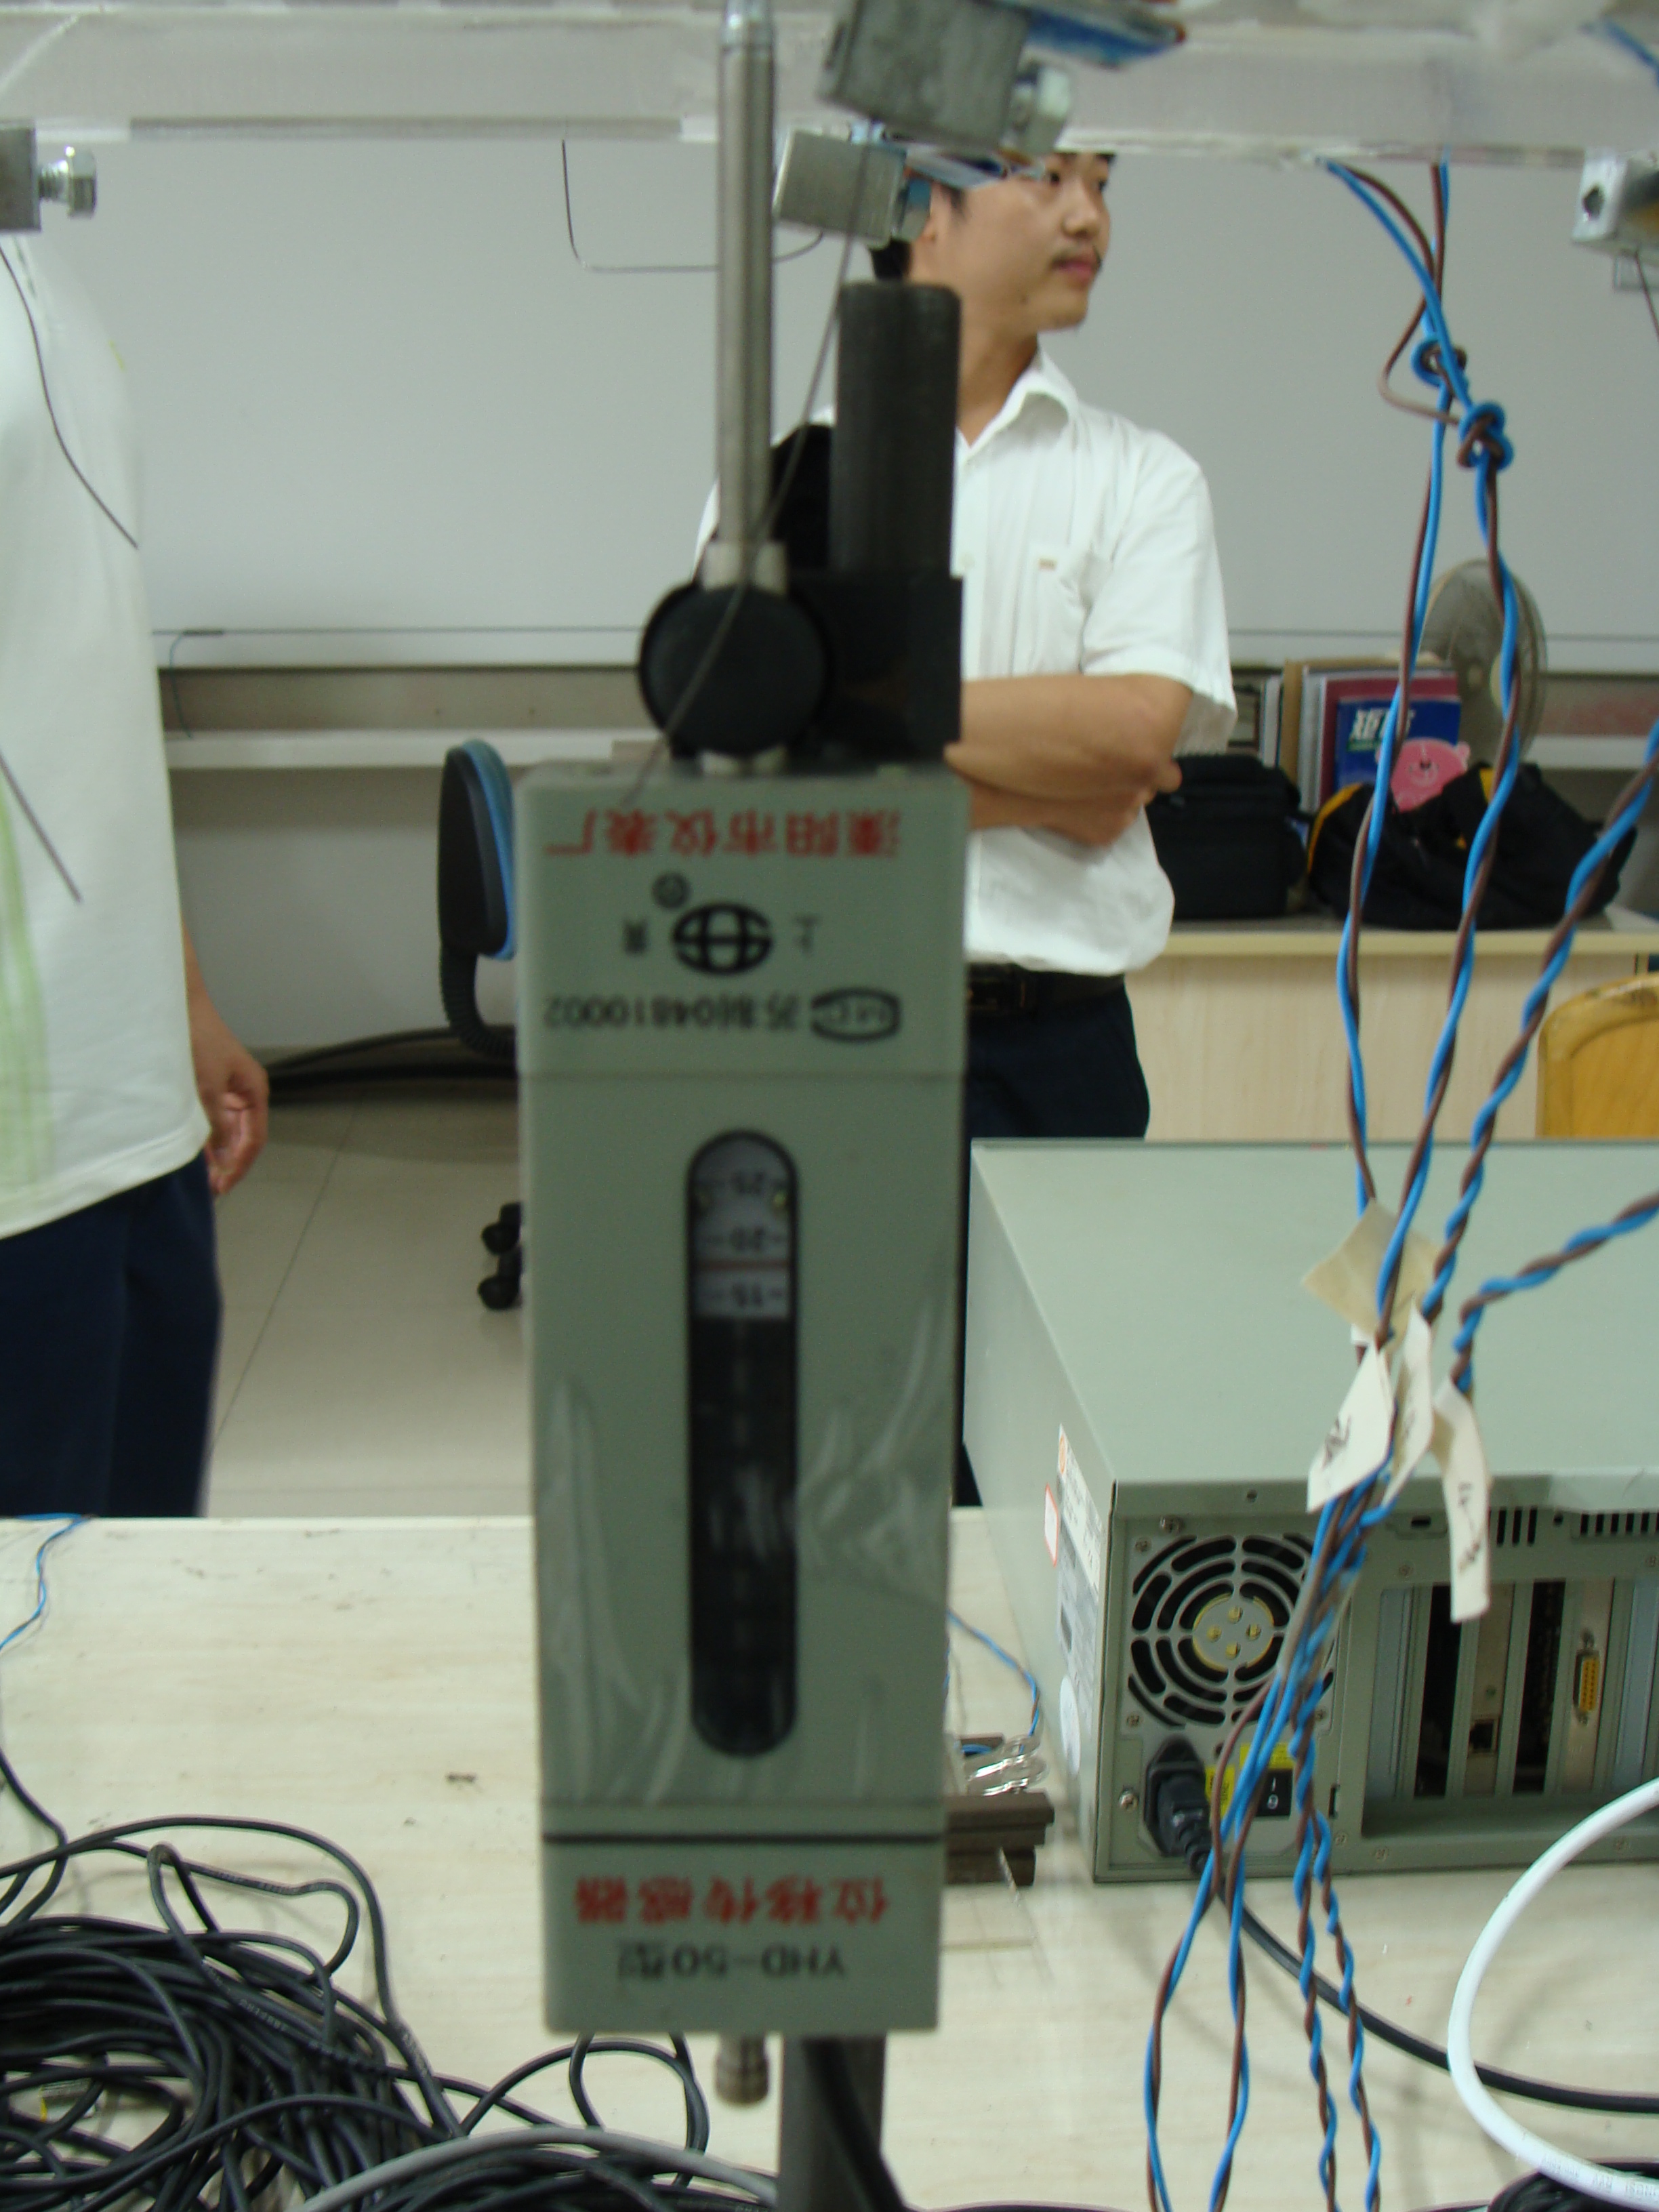

Supplement: f1 [file 4687370.f1.zip › The experimental images/Vertical displacement meter for main beam.JPG]
